# Supplementary material
Source: PubMed Central journal article supplement (PMC3506011)
Supplement: NIHMS403328-supplement-1_si_001.pdf [file NIHMS403328-supplement-1_si_001.pdf]

RT: 0.00 - 61.02

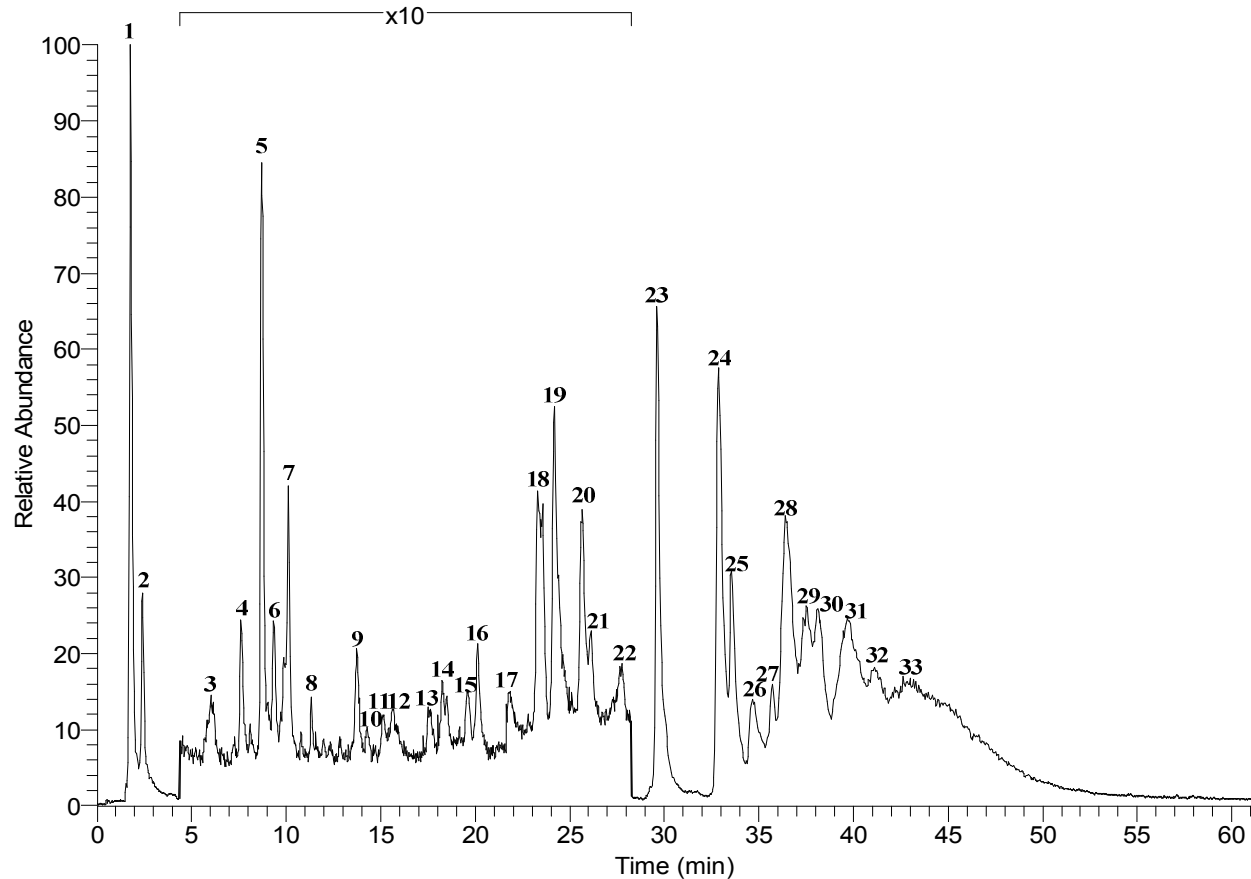

NL:  
1.58E7  
TIC F: FTMS - p  
ESI Full ms  
[100.00-  
2000.00] MS  
MangoSeedsNe  
g

1

Figure S1 Total ion chromatogram of Mexican mango seeds.

2

RT: 1.33 - 65.12

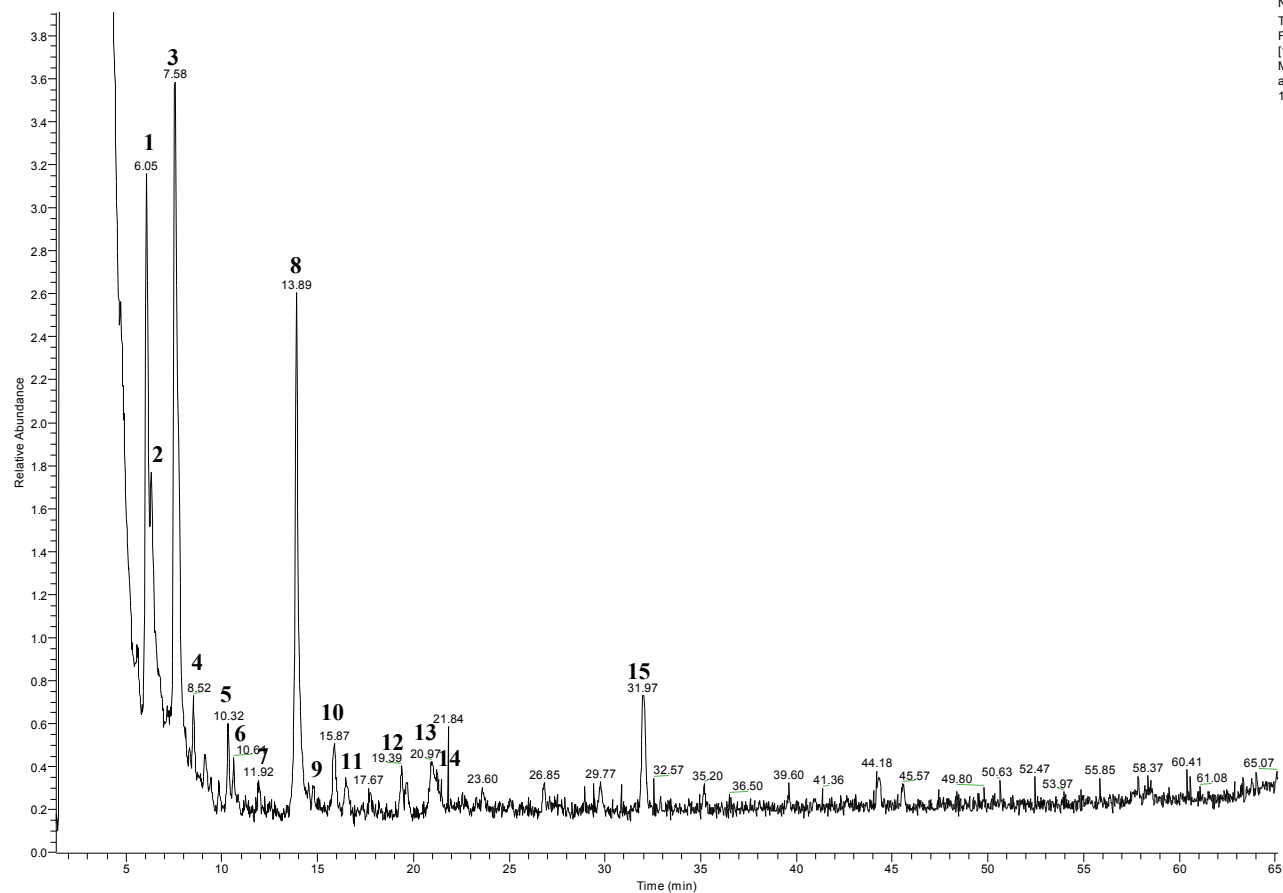

NL: 4.35E7  
TIC F: FTMS - p ESI  
Full ms  
[100.00-2000.00]  
MS  
africanmangopure\_  
110927171321

Figure S2. The major compounds found in Product A

**Table S1 The UHPLC-HRMS data of constituents from Mexican mango seeds**

| Peak No | RT (min) | Formula                                         | [M-H] <sup>+</sup> | Error (mmu) | UV ( $\lambda_{\max}$ ,nm) | Main Product Ions                                           | Tentative Identification                                                   |
|---------|----------|-------------------------------------------------|--------------------|-------------|----------------------------|-------------------------------------------------------------|----------------------------------------------------------------------------|
| 1       | 1.80     | C <sub>12</sub> H <sub>22</sub> O <sub>11</sub> | 341.1084           | -0.505      | 233                        | 179, 143, 113                                               | hexosyl-hexose                                                             |
| 2       | 1.87     | C <sub>13</sub> H <sub>16</sub> O <sub>10</sub> | 331.0668           | -0.240      | 278, 229                   | 271, 211, 193, 169, 125                                     | galloy-hexose                                                              |
| 3       | 5.99     | C <sub>20</sub> H <sub>20</sub> O <sub>14</sub> | 483.0770           | -1.068      | 271, 231                   | 331, 169                                                    | di-galloy-hexose                                                           |
| 4       | 7.70     | C <sub>30</sub> H <sub>25</sub> O <sub>12</sub> | 577.1341           | -1.059      | 232, 276                   | 425, 407, 451, 559, 289                                     | epicatechin-(4 $\beta$ →8)-catechin                                        |
| 5       | 8.72     | C <sub>34</sub> H <sub>24</sub> O <sub>22</sub> | 289.0715           | -0.291      | 232, 274                   | 245, 205, 179, 271                                          | catechin                                                                   |
| 6       | 9.35     | C <sub>27</sub> H <sub>24</sub> O <sub>22</sub> | 865.1964           | -2.187      | 232, 276                   | 695, 739, 713, 847, 577, 543, 425, 287                      | proanthocyanidin C1                                                        |
| 7       | 10.02    | C <sub>26</sub> H <sub>26</sub> O <sub>18</sub> | 625.1029           | -1.727      | 252, 355                   | MS2[625]: 463, 300                                          | quercetin 3,7-di-O-glucoside                                               |
| 8       | 11.34    | C <sub>16</sub> H <sub>28</sub> O <sub>11</sub> | 395.1552           | -0.645      | 231                        | MS3[625-->463]: 300, 293, 125, 251, 233, 351                | 3-methylbutanoyl-1-O- $\beta$ -D-glucopyranosyl- $\beta$ -D-apiofuranoside |
| 9       | 13.73    | C <sub>19</sub> H <sub>18</sub> O <sub>11</sub> | 421.0770           | -0.665      | 232, 258, 312, 365         | MS2[421]: 331, 301, 403                                     | mangiferin                                                                 |
| 10      | 14.30    | C <sub>33</sub> H <sub>28</sub> O <sub>19</sub> | 727.1129           | -2.352      | 232, 276                   | MS3[421-->331]: 259, 271, 313, 301, 285, 575, 405, 465, 557 | maclurin di-O-galloyl-glucoside                                            |

|    |       |                                                 |          |        |          |                                              |                                                        |
|----|-------|-------------------------------------------------|----------|--------|----------|----------------------------------------------|--------------------------------------------------------|
| 11 | 15.03 | C <sub>27</sub> H <sub>24</sub> O <sub>18</sub> | 635.0876 | -1.397 | 232, 271 | MS2[635]: 465<br>MS3[635-->465]: 313,<br>169 | tri- <i>O</i> -galloyl-hexose                          |
| 12 | 15.65 | C <sub>37</sub> H <sub>30</sub> O <sub>16</sub> | 729.1441 | -2.008 | 232,276  | 577, 559, 407, 425                           | unknown                                                |
| 13 | 17.63 | C <sub>34</sub> H <sub>28</sub> O <sub>22</sub> | 789.0975 | -2.415 | 232, 276 | 637, 619                                     | unknown                                                |
| 14 | 18.25 | C <sub>37</sub> H <sub>30</sub> O <sub>16</sub> | 729.1447 | -1.398 | 232, 276 | 407, 577, 559, 603,<br>451, 441              | epigallocatechin 3- <i>O</i> -(4-hydroxy-<br>benzoate) |
| 15 | 19.59 | C <sub>27</sub> H <sub>24</sub> O <sub>18</sub> | 635.0875 | -1.467 | 232, 271 | 465, 483, 313                                | trigalloyl hexose                                      |
| 16 | 20.12 | C <sub>21</sub> H <sub>20</sub> O <sub>11</sub> | 447.0924 | -0.845 | 232, 276 | 285, 327                                     | kaemferol-hexoside                                     |
| 17 | 21.76 | C <sub>14</sub> H <sub>5</sub> O <sub>8</sub>   | 300.9984 | -0.610 | 232, 365 | 301, 257, 229, 185, 284                      | ellagic acid                                           |
| 18 | 23.44 | C <sub>34</sub> H <sub>28</sub> O <sub>22</sub> | 787.0975 | -2.475 | 232, 276 | 635, 483                                     | tetra- <i>O</i> -galloyl-hexose                        |
| 19 | 24.15 | C <sub>34</sub> H <sub>28</sub> O <sub>22</sub> | 787.0980 | -1.985 | 232,277  | 635, 617, 465                                | tetra- <i>O</i> -galloyl-hexose                        |
| 20 | 25.65 | C <sub>34</sub> H <sub>28</sub> O <sub>22</sub> | 787.0980 | -3.796 | 232, 277 | 617, 465                                     | tetra- <i>O</i> -galloyl-hexose                        |
| 21 | 26.09 | C <sub>34</sub> H <sub>28</sub> O <sub>22</sub> | 787.0971 | -2.835 | 232, 276 | 635, 617, 465                                | tetra- <i>O</i> -galloyl-hexose                        |
| 22 | 27.74 | C <sub>41</sub> H <sub>32</sub> O <sub>26</sub> | 939.1080 | -2.874 | 232, 276 | 787, 617                                     | pent- <i>O</i> -galloyl-hexose                         |
| 23 | 29.62 | C <sub>41</sub> H <sub>32</sub> O <sub>26</sub> | 939.1110 | -1.545 | 231, 279 | 769, 787, 617                                | pent- <i>O</i> -galloyl-hexose                         |

---

|    |       |                                                 |           |        |          |            |                                 |
|----|-------|-------------------------------------------------|-----------|--------|----------|------------|---------------------------------|
| 24 | 32.90 | C <sub>48</sub> H <sub>36</sub> O <sub>30</sub> | 1091.1190 | -2.842 | 231, 278 | 939, 769   | hexa- <i>O</i> -galloyl-hexose  |
| 25 | 33.52 | C <sub>48</sub> H <sub>36</sub> O <sub>30</sub> | 1091.1208 | -1.012 | 231, 278 | 939, 769   | hexa- <i>O</i> -galloyl-hexose  |
| 26 | 34.62 | C <sub>48</sub> H <sub>36</sub> O <sub>30</sub> | 1091.1207 | -1.132 | 231, 278 | 939, 769   | hexa- <i>O</i> -galloyl-hexose  |
| 27 | 35.73 | C <sub>48</sub> H <sub>36</sub> O <sub>30</sub> | 1091.1206 | -1.252 | 231, 278 | 939, 769   | hexa- <i>O</i> -galloyl-hexose  |
| 28 | 36.40 | C <sub>55</sub> H <sub>40</sub> O <sub>34</sub> | 1243.1320 | -0.861 | 231, 279 | 1091, 939  | hepta- <i>O</i> -galloyl-hexose |
| 29 | 37.39 | C <sub>55</sub> H <sub>40</sub> O <sub>34</sub> | 1243.1302 | -2.571 | 231, 279 | 1091, 939  | hepta- <i>O</i> -galloyl-hexose |
| 30 | 38.15 | C <sub>55</sub> H <sub>40</sub> O <sub>34</sub> | 1243.1307 | -2.081 | 231, 279 | 1091, 939  | hepta- <i>O</i> -galloyl-hexose |
| 31 | 39.61 | C <sub>62</sub> H <sub>44</sub> O <sub>38</sub> | 1395.1433 | -0.469 | 231, 279 | 1243, 1091 | octa- <i>O</i> -galloyl-hexose  |
| 32 | 41.21 | C <sub>62</sub> H <sub>44</sub> O <sub>38</sub> | 1395.1410 | -2.779 | 231, 279 | 1243, 1091 | octa- <i>O</i> -galloyl-hexose  |
| 33 | 45.15 | C <sub>69</sub> H <sub>48</sub> O <sub>42</sub> | 1547.1523 | -2.398 | 231, 277 | 1395, 1243 | nona- <i>O</i> -galloyl-hexose  |

---

**Table S2. The label claims of five African mango based dietary supplements.**

| Product | Serving form | Labeled African Mango seed extract weight mg/ Per Serving) | Other Botanical extract added                                                                                                                                           |
|---------|--------------|------------------------------------------------------------|-------------------------------------------------------------------------------------------------------------------------------------------------------------------------|
| A       | Capsule      | 150                                                        | -                                                                                                                                                                       |
| B       | Capsule      | 300                                                        | Green Tea extract                                                                                                                                                       |
| C       | Capsule      | 350                                                        | Green Tea extract                                                                                                                                                       |
| D       | Capsule      | n/a                                                        | Maqui Berry, Acai fruit, green tea extract, resveratrol, Caffeine anhydrous, Apple Cider Vinegar, Kelp, Grapefruit<br>Green Tea extract, Cranberry, Kelp and Grapefruit |
| E       | Powder       | 400                                                        | Raspberry, Natural Mixed Berry Flavor, Cane Juice, Fibersol, Citric Acid, Stevia                                                                                        |
| F       | Powder       | 10:1 extract                                               | n/a                                                                                                                                                                     |
| G       | Powder       | n/a                                                        | n/a                                                                                                                                                                     |
